# Supplementary material for: Next-Generation Sequencing of Two Mitochondrial Genomes from Family Pompilidae (Hymenoptera: Vespoidea) Reveal Novel Patterns of Gene Arrangement
Source: MDPI journal article supplement (doi:10.3390/ijms17101641), 2016-10-11
Supplement: s1 [file s1]

# Supplementary Materials: Next-Generation Sequencing of Two Mitochondrial Genomes from Family Pompilidae (Hymenoptera: Vespoidea) Reveal Novel Patterns of Gene Arrangement

Peng-Yan Chen, Bo-Ying Zheng, Jing-Xian Liu and Shu-Jun Wei

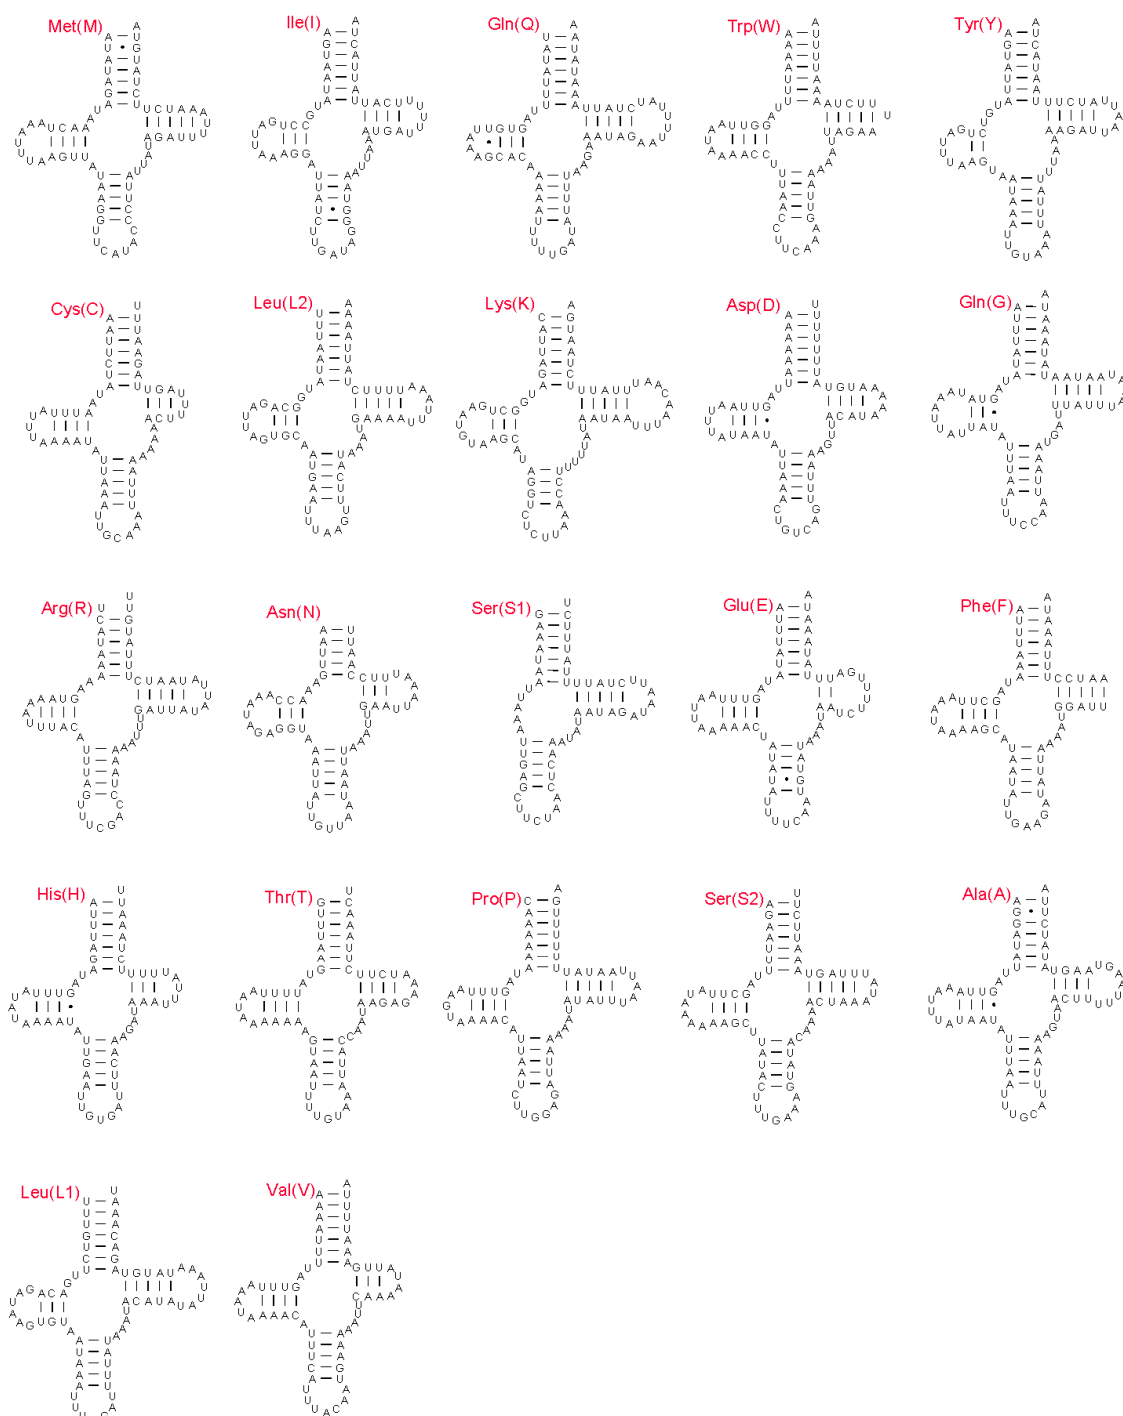

**Figure S1.** Predicted secondary structures for the 22 typical tRNA genes of *Auplopus* mitochondrial genome. Base-pairing is indicated as follows: Watson–Crick pairs by lines, wobble GU pairs by dots and other noncanonical pairs by circles.

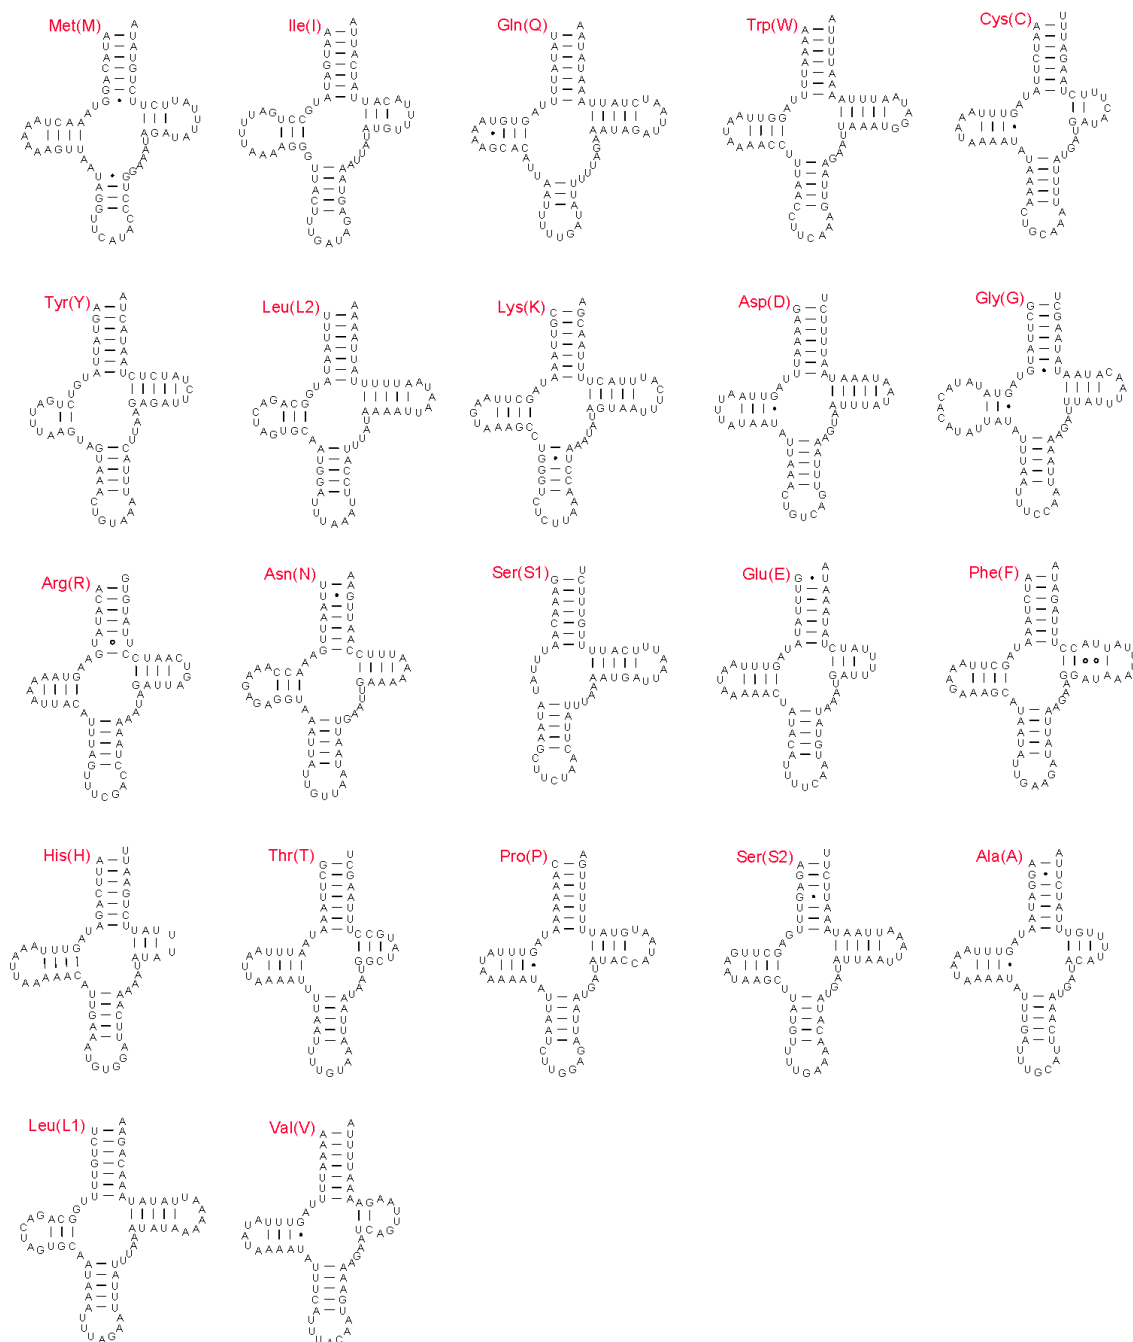

**Figure S2.** Predicted secondary structures for the 22 typical tRNA genes of *Ageoioideus* mitochondrial genome. Symbols are as in Figure S1.

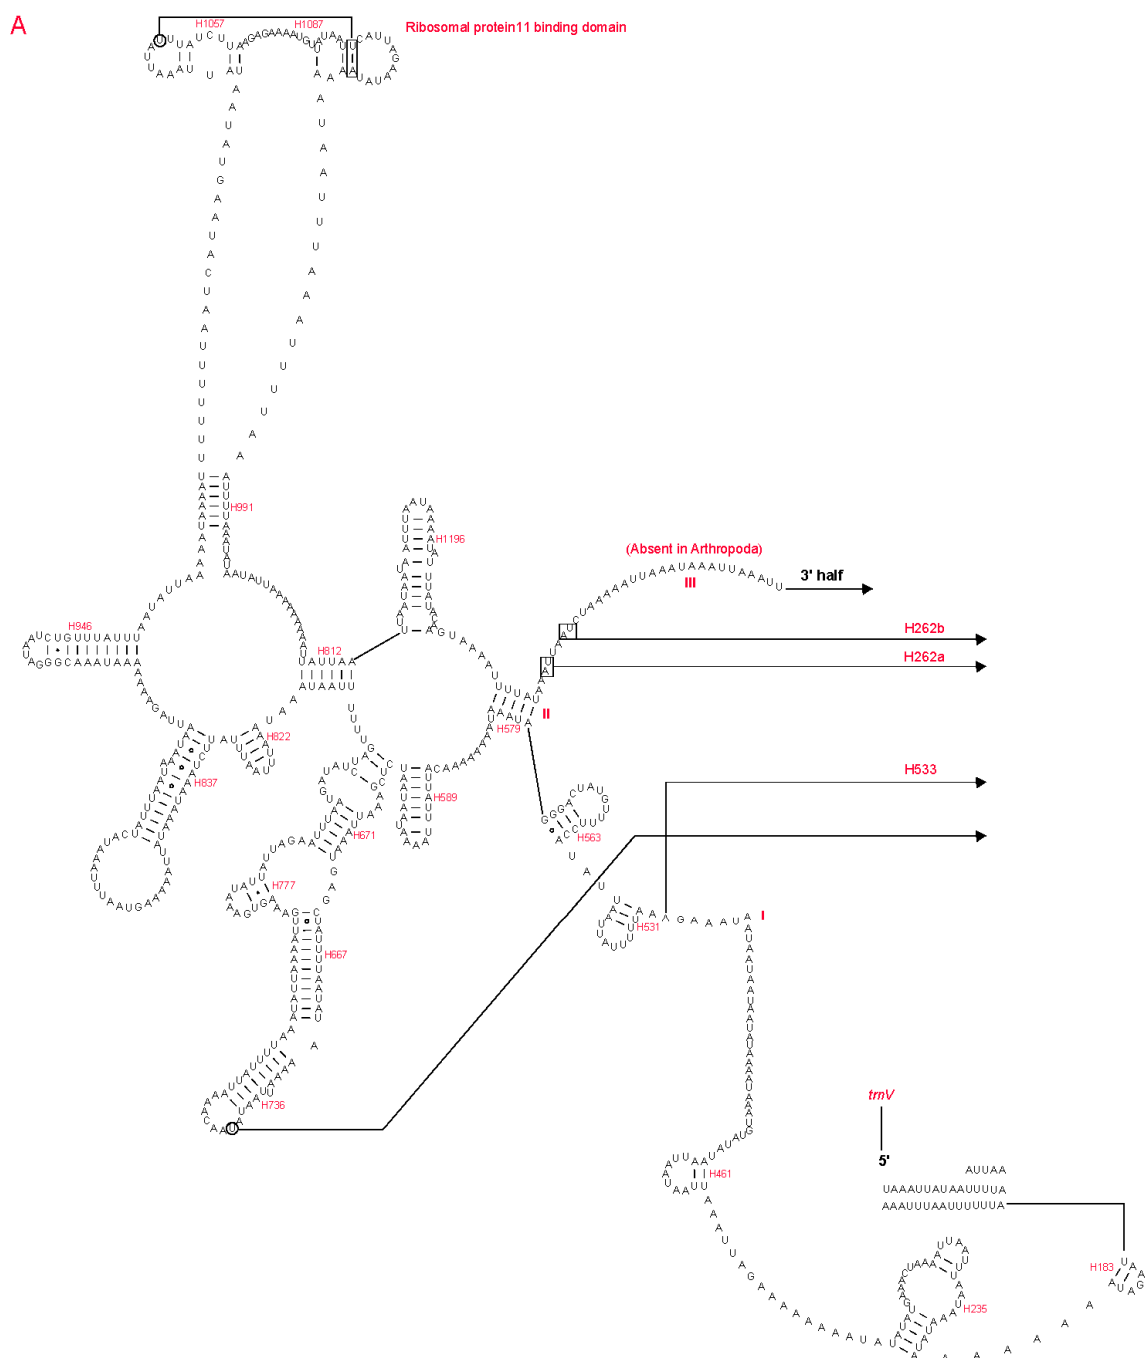

Figure S3. Cont.

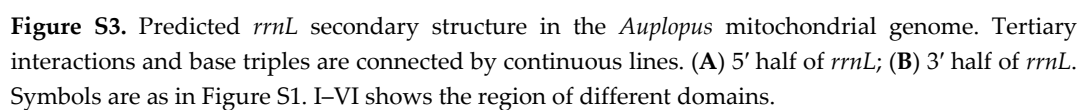

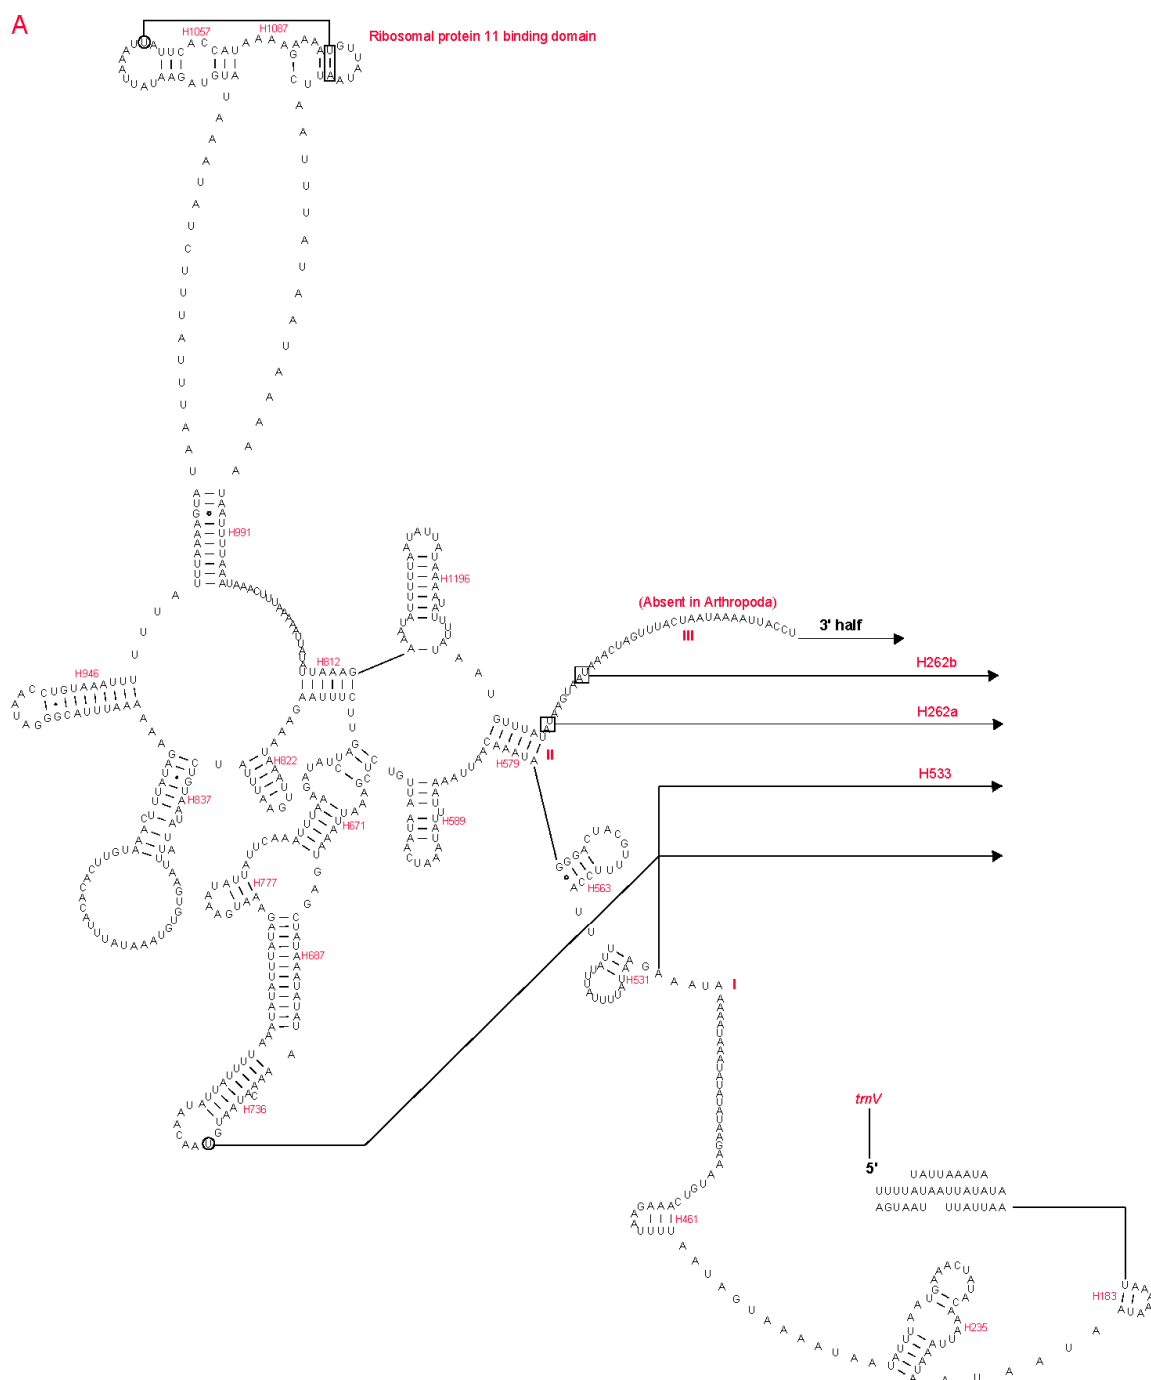

Figure S4. Cont.

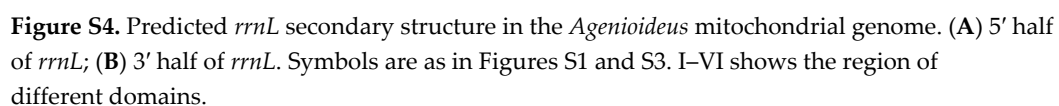

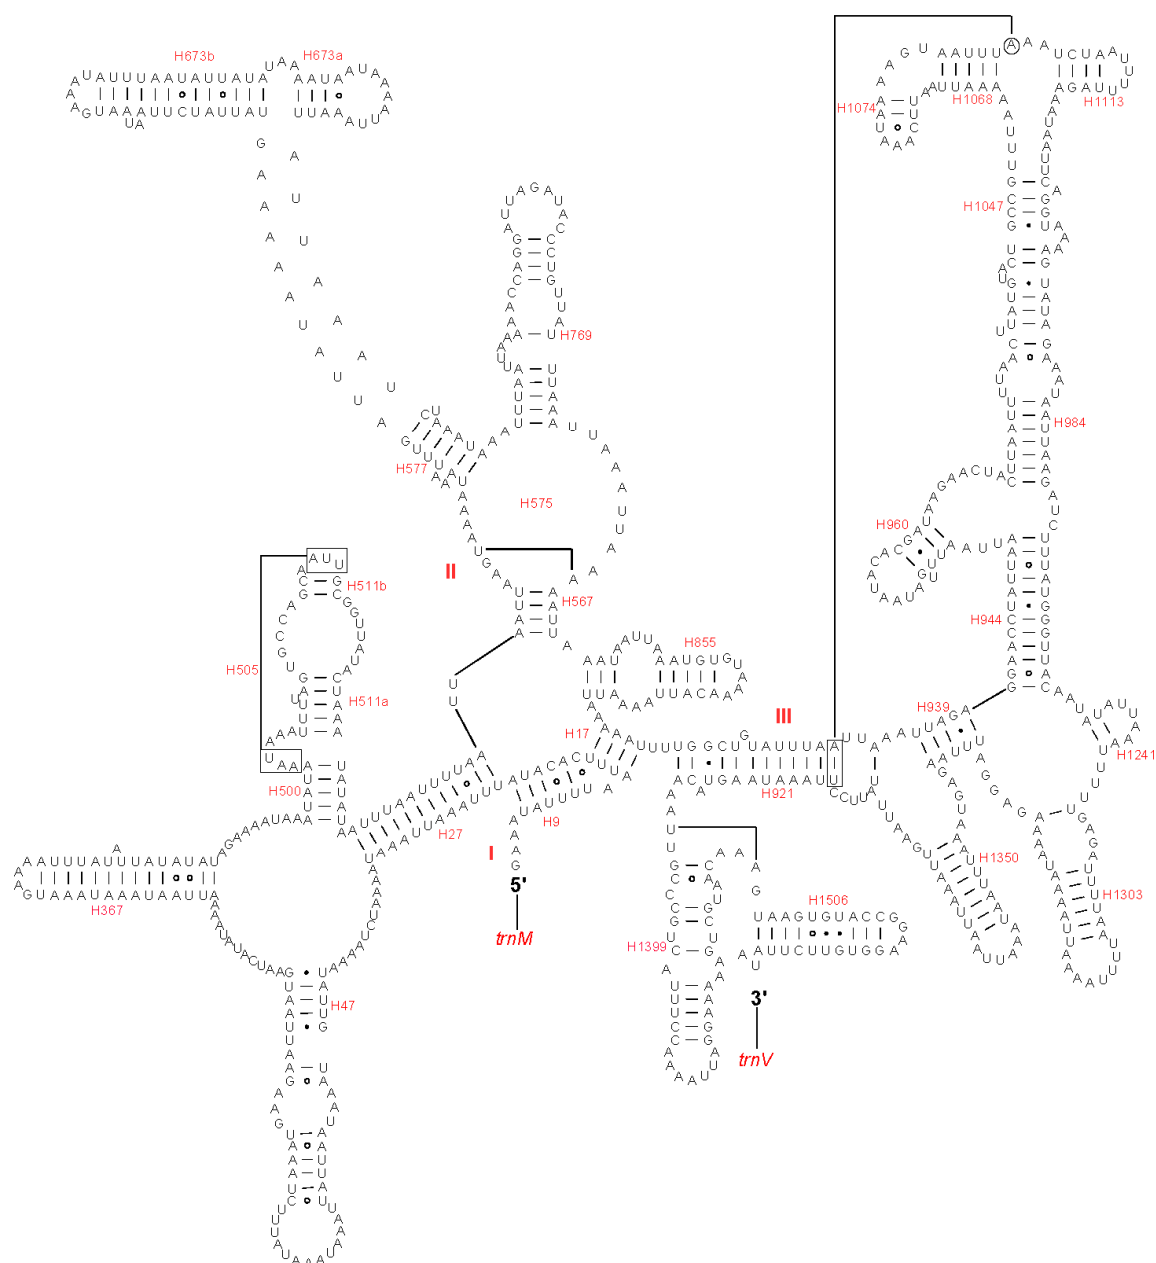

**Figure S5.** Predicted *rrnS* secondary structure in the *Auplopus* mitochondrial genome. Symbols are as in Figures S1 and S3. I–VI shows the region of different domains.

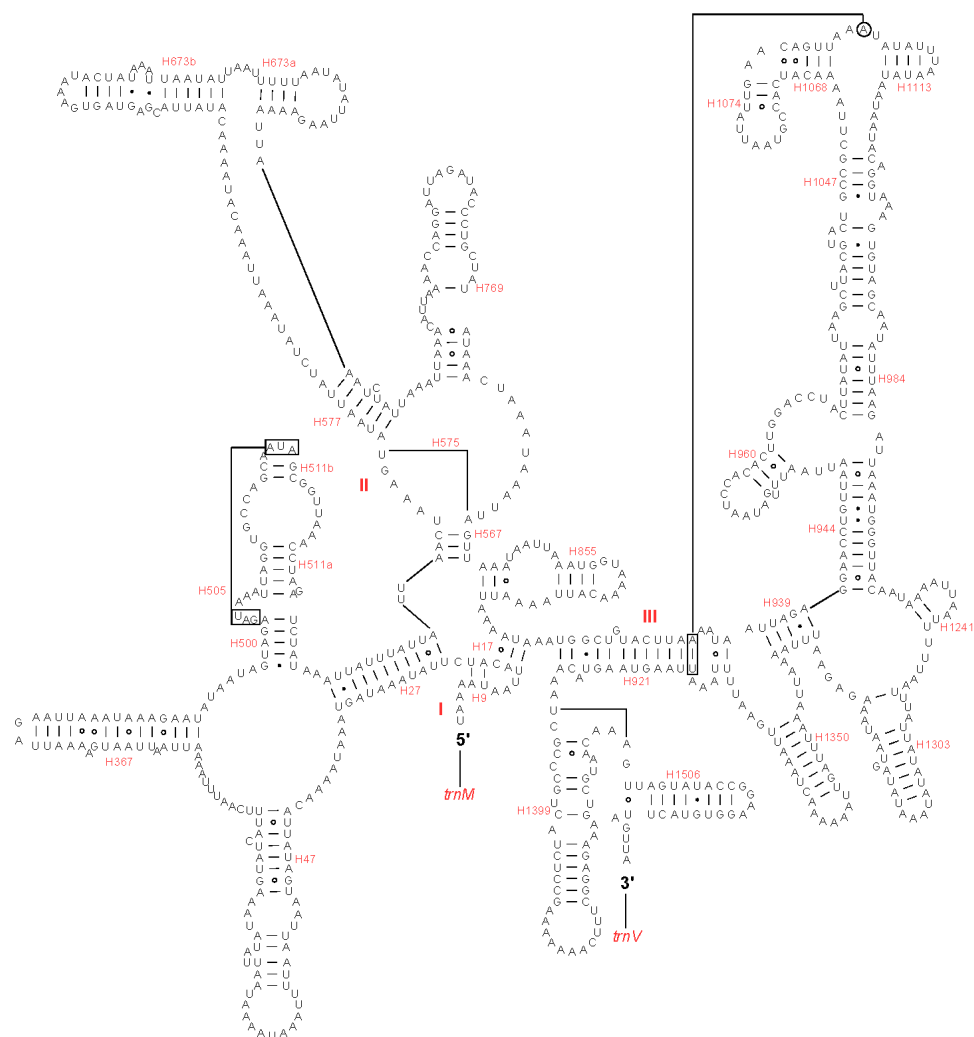

**Figure S6.** Predicted *rrnS* secondary structure in the *Agenioideus* mitochondrial genome. Symbols are as in Figures S1 and S3. I–VI shows the region of different domains.
